# Evidence for a role of transmembrane protein p25 in localization of protein tyrosine phosphatase TC48 to the ER

Vijay Gupta and Ghanshyam Swarup\*

Centre for Cellular and Molecular Biology, Uppal Road, Hyderabad 500 007, India

\*Author for correspondence (e-mail: gshyam@ccmb.res.in)

Accepted 11 January 2006

Journal of Cell Science 119, 1703-1714 Published by The Company of Biologists 2006  
doi:10.1242/jcs.02885

## Summary

T-cell protein tyrosine phosphatase gives rise to two splice isoforms: TC48, which is localized to the endoplasmic reticulum (ER) and TC45, a nuclear protein. The present study was undertaken to identify proteins that are involved in targeting TC48 to the ER. We identified two TC48-interacting proteins, p25 and p23, from a yeast two-hybrid screen. p23 and p25 are members of a family of putative cargo receptors that are important for vesicular trafficking between Golgi complex and ER. Both p23 and p25 associate with overexpressed TC48 in Cos-1 cells as determined by coimmunoprecipitation. A significant amount of TC48 colocalized initially with ERGIC and Golgi complex markers (in addition to ER and nuclear membrane localization) and was then retrieved to the ER. Coexpression with p25 enhanced ER localization of TC48, whereas coexpression with p23 resulted in its trapping in

membranous structures. Coexpression of a p25 mutant lacking the ER-localization signal KKxx resulted in enhanced Golgi localization of TC48. Forty C-terminal amino acid residues of TC48 (position 376-415) were sufficient for interaction with p23 (but not with p25) and targeted green fluorescence protein (GFP) to the Golgi complex. Targeting of GFP to the ER required 66 C-terminal amino acid residues of TC48 (position 350-415), which showed interaction with p25 and p23. We suggest that TC48 translocates to the Golgi complex along the secretory pathway, whereas its ER localization is maintained by selective retrieval enabled by interactions with p25 and p23.

Key words: Transmembrane protein p25, Tyrosine phosphatase TC48, Transmembrane protein p23, Endoplasmic reticulum

## Introduction

Protein tyrosine phosphatases (PTPs) and their associated signaling pathways are crucial for the regulation of numerous cell functions including growth, mitogenesis, motility, cell-cell interactions, metabolism, signal transduction and gene expression (Tonks and Neel, 1996; Bourdeau et al., 2005). The T-cell protein tyrosine phosphatase TCPTP (encoded by *PTPN2*) is an intracellular protein tyrosine phosphatase, which is ubiquitously expressed (Cool et al., 1989; Mosinger et al., 1992; Kamatkar et al., 1996). There are two splice variants of TCPTP in human cells, TC45 [387 amino acids (aa)] and TC48 (415 aa), which vary at their C-terminal ends. In human and rat TC48, the last six aa of TC45 are replaced by 34 aa (mostly hydrophobic) (Lorenzen et al., 1995; Reddy and Swarup, 1995). This difference in the C-terminus determines the different subcellular localization, substrate specificity and enzymatic properties of these two splice variants (Lorenzen et al., 1995; Kamatkar et al., 1996). TC45 localizes to the nucleus by virtue of a bipartite nuclear localization signal (NLS) present in the C-terminus (Radha et al., 1994; Tillman et al., 1994; Lorenzen et al., 1995). This C-terminal region of TC45 is also involved in binding to DNA (Radha et al., 1993; Kamatkar et al., 1996). The TC48 isoform is present in the endoplasmic reticulum (ER) and also in the nuclear membrane. The ER localization is determined by two signal sequences

present in the C-terminal 70 aa of TC48 (Lorenzen et al., 1995).

Several substrates of TC45 have been identified, most of which are cytoplasmic the only exceptions are Stat proteins which are nuclear (reviewed in Bourdeau et al., 2005). However only EGF receptor in the ER is a specific substrate of TC48 whereas EGF receptor in the plasma membrane is dephosphorylated by TC45 (Tiganis et al., 1998). TC48 as well as TC45 are able to downregulate insulin-induced signaling by dephosphorylating the insulin receptor (Galic et al., 2003). Thus no substrates or regulators have been identified, which specifically interact with TC48 but not with TC45 isoform.

Although the sequences that target TC48 to the ER have been identified in the C-terminal 70-aa region, these sequences do not have any of the well-known ER targeting signals, such as KDEL, di-lysine or diarginine motifs (Lorenzen et al., 1995). Therefore, the mechanism by which TC48 is targeted to the ER is not known. In this study, we carried out yeast two-hybrid screening to identify proteins that interact with TC48 and that might be involved in determining its subcellular location. We isolated several yeast two-hybrid-positive clones encoding two members, p23 and p25, of the p24 family of putative cargo receptors (Schimmoller et al., 1995; Stamnes et al., 1995). p24 family proteins are the major components of vesicles moving between ER and Golgi and show

predominantly cis Golgi and/or ER-localization (Stamnes et al., 1995; Rojo et al., 1997; Dominguez et al., 1998; Fullekrug et al., 1999; Emery et al., 2000). p24 proteins are type I transmembrane proteins containing a cleavable N-terminal signal sequence, a large luminal domain, an exoplasmic coiled-coil domain required for oligomerization, a hydrophobic transmembrane (TM) domain and a small (12-18 aa) cytoplasmic C-terminus (Stamnes et al., 1995; Blum et al., 1996). Although the precise function of p24 proteins is still unclear, in general, several biochemical, genetic and molecular studies implicate them in various functions related to vesicular transport. They were proposed to be involved in cargo-protein selection and packaging, vesicle biogenesis and function, maintenance of functional ER-retention and retrieval machinery, and quality control of protein movement through the secretory system (Schimmoller et al., 1995; Stamnes et al., 1995; Belden and Barlowe, 1996; Fiedler et al., 1996; Sohn et al., 1996; Dominguez et al., 1998; Bremser et al., 1999; Fullekrug et al., 1999; Wen and Greenwald, 1999; Kaiser, 2000; Muniz et al., 2000; Carney and Bowen, 2004).

There are many evidences, which suggest a role of p24 proteins in retrograde transport from the Golgi to the ER. This role in retrograde transport might involve their function in COPI-vesicle (vesicles known to be involved in retrograde transport) formation, COPI-vesicle-structure maintenance or their role as coat-receptor, cargo-receptor, adaptor or transport factor (Fiedler et al., 1996; Sohn et al., 1996; Bremser et al., 1999). Coatomer, a polypeptide complex involved in membrane traffic at the Golgi complex, has been suggested to have a role in retrograde transport. The C-terminal tail of some of the p24 proteins (including p23 and p25) interacts with subunits of the COPI-vesicle coat and p24 proteins were found to be enriched in COPI vesicles in yeast as well as in mammalian cells (Stamnes et al., 1995; Sohn et al., 1996). Moreover, deletion of p24 proteins in yeast results in secretion of elevated levels of the ER-resident protein kar2p, indicating that it could not be retrieved to the ER (Elrod-Erickson and Kaiser, 1996).

In mammalian cells, p24 family proteins have been proposed to have a structural morphogenic role in organization and/or biogenesis of the Golgi complex (Denzel et al., 2000; Rojo et al., 2000). Cells from p23-heterozygous mice show reduced stack size and altered structure of the Golgi complex (Denzel et al., 2000). p23-heterozygous mice also show reduced p25 and p26 protein levels, indicating the interdependence of these proteins. Homozygous p23-knockout mice are not viable, suggesting an essential and non-redundant role in very early stages of development (Denzel et al., 2000). p23 is proposed to function as a coatomer receptor in the Golgi, because the protein is enriched in COPI vesicles and its cytoplasmic domain binds to coatomer (Stamnes et al., 1995; Sohn et al., 1996). p25 has been shown to form highly specialized domains, thereby regulating membrane composition and dynamics (Emery et al., 2003). When the p25SS mutant (in which canonical KKxx motif for ER retention has been inactivated by mutation to serine) is overexpressed in HeLa cells it exits the ER and Golgi and reaches the plasma membrane where it helps in specialized domain formation via cholesterol exclusion. During overexpression of p25SS, p23 and other family members also reached the plasma membrane, indicating strong dependence upon p25 to maintain their ER

and Golgi retention in early biosynthetic pathway (Emery et al., 2003). These findings also suggested that, p25 is the major player among p24 family by regulating the localization of other family members by anchoring p24 oligomers in the retrograde pathway mediated by COPI vesicles. Formation of hetero-oligomers of p24 family members also indicates the interdependence of p24 proteins for their functional regulation (Jenne et al., 2002). p25 has also been implicated in the formation of vesicular tubular clusters and ER-cargo exit sites (Lavoie et al., 1999).

In this study, we show that TC48 interacts physically *in vivo* with the two p24 family members p23 and p25. Coexpression of p25 and p23 affects TC48 localization; whereas p25 enhances ER localization of TC48, coexpression of p23 traps TC48 in membranous structures. TC48 escapes the ER and gets back recycled, although it does not contain any known retrieval signals indicating the physiological relevance of the interaction with p23 and p25. The C-terminal sequences of TC48 that are required for targeting a green fluorescence protein (GFP)-TC48 fusion protein (GFP-TC48) to the ER and Golgi, are also involved in the interaction with p25 and p23 proteins. Our results suggest that p25 and p23 proteins play an important and direct role in targeting TC48 to its proper subcellular location.

## Results

### Identification of p23 and p25 as TC48-interacting proteins

To identify TC48-interacting proteins, we screened a human placental cDNA library using a Gal4-based yeast two-hybrid system. Full-length TC48 was used as bait. Several positive clones were obtained under various selection criteria (their ability to grow on adenine- or histidine-deficient plates and also by their ability to turn blue in the presence of  $\beta$ -galactosidase substrate). One of the proteins identified by this method was transmembrane protein p23, a p24 family member also known as Tmp 21-1. The cDNA clone obtained during screening, codes for an almost full-length p23 protein (aa 26-219) (Blum et al., 1996; Blum et al., 1999; Rojo et al., 1997; Rojo et al., 2000). Another protein of this family, p25, was also identified in this screen (Dominguez et al., 1998; Emery et al., 2000; Emery et al., 2003). The cDNA clone obtained for p25, codes for aa 142-214, suggesting, therefore, that the C-terminal 73 aa of this protein are sufficient to interact with TC48. The protein expressed by the control plasmid pGBKT-7 (containing the Gal4-DNA-binding domain) did not show any interaction with p23 or p25 (Fig. 1A). The interaction of these proteins with TC48 was very specific because they did not show any interaction with TC45, a splice variant of TC48 that differs only in a short C-terminal segment (Fig. 1A,C). This experiment also showed that C-terminal sequences of TC48 (which are not present in TC45) are necessary for interaction with p23 and p25. A C-terminal segment of TC48 coding for C-terminal 66 aa interacted with p23 and p25 in the yeast two-hybrid system (Fig. 1B). TC48 did not interact with SV40 T antigen or p53 (data not shown), further showing that the interaction with p23 and p25 is specific. The C-terminal 66 aa of TC48 did not show any interaction with the protein expressed by the control plasmid (Fig. 1B).

We determined the domain requirement of p23 and p25 for interaction with TC48 by making deletion constructs (Fig. 2A).

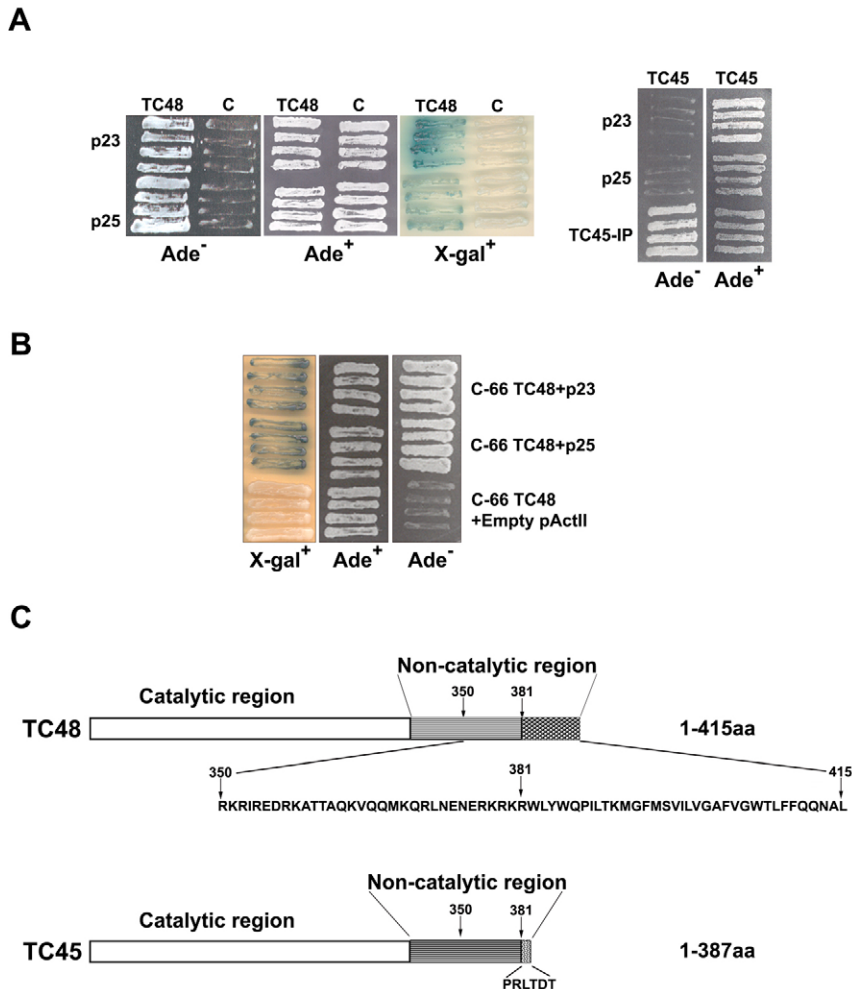

**Fig. 1.** Yeast two-hybrid analysis reveals an interaction between TC48 and p23/p25. (A) The PJ69-4A yeast strain was co-transformed with TC-PTP (TC48 or TC45) GAL4-DNA-binding-domain fusion constructs and p23 or p25 GAL4-activation-domain fusion constructs obtained in the yeast two hybrid screen. Transformants were grown on plates with (Ade<sup>+</sup>) or without (Ade<sup>-</sup>) adenine and also on plates supplemented with  $\beta$ -galactosidase substrate X-gal (X-gal<sup>+</sup>). Ade<sup>-</sup> is the yeast-medium-plate lacking Leu, Trp and Ade, in which activation of the adenine reporter gene is being tested. Ade<sup>+</sup> is the yeast-medium-plate lacking Leu and Trp, selecting only for the presence of plasmids to be tested for interaction. (B) Interaction of the C-terminal 66 aa (C-66) of TC-48 with p23 and p25. (C) Schematic representation of TC48 and TC45. The C66-TC48 construct encodes the C-terminal 66 aa of TC48 (from 350-415); aa 1-381 are identical in TC48 and TC45. (C) Control plasmid pGBKT-7; TC45-IP is a positive control for the TC45-interacting protein.

Truncated p23 lacking the luminal domain but containing C-terminal sequences (aa 140 to 219) was able to interact with TC48 in yeast (Fig. 2A,B). A smaller construct lacking the coiled-coil region and containing aa 185 to 219, did not show any significant interaction with TC48 (Fig. 2B). Similarly, the p25 clone obtained during screening, containing aa 142-214 (p25CC), was able to interact with TC48, but a smaller construct coding for aa 181 to 214 of p25 was not (Fig. 2B). These results suggest that, the C-terminal sequence of p25 and p23 (encompassing the coiled-coil, transmembrane and cytoplasmic domains) is sufficient for any interaction with TC48 and, the luminal domain is not required for this interaction. Requirement of coiled-coil domain (which is involved in dimerization) indicates that p23 and p25 interact as dimers with TC48.

Next, we examined the interaction of TC48 with p23 and p25 in mammalian cells. The cDNAs expressing full-length GFP-TC48 and myc-tagged full-length human p23 or p25 were coexpressed in Cos-1 cells (Emery et al., 2000). After 36 hours of transfection cell lysates were prepared and immunoprecipitation was carried out with anti-myc monoclonal antibody or with a control antibody. TC48 was detected in the immunoprecipitate with anti-myc antibody but not in the immunoprecipitate with control antibody (Fig. 3A,B). This result showed that TC48 can interact with p23 and

p25 in mammalian cells. Endogenous p23 and p25 also interacted with exogenous TC48, as determined by coimmunoprecipitation of GFP-TC48 from GFP-TC48-transfected Cos-1 cells with antibodies that recognize native p23 and p25 proteins (Fig. 3C).

#### TC48 localizes to Golgi and ER

Human TTC48 has been shown to localize to the ER (Lorenzen et al., 1995). Rat TC48 (also known as PTP-S4) has been shown to localize to nuclear membranes in addition to localizing to the ER (Kamatkar et al., 1996). In these studies, the localization of TC48 was seen after 48-64 hours of transfection with their respective expression vectors. We observed that, after 12 hours of transfection GFP-TC48 was localized in most of the cells to a Golgi-like dense structure near the nucleus (Fig. 4A). The GFP-TC48 plasmid expressed full-length TC48 fused to the C-terminus of GFP. Staining of GFP-TC48-expressing cells with the known Golgi marker protein giantin showed that TC48 colocalized with this protein (determined by confocal microscopy; Fig. 4A). Proteins reaching the Golgi complex pass through the ER-Golgi intermediate compartment (ERGIC) and it is known that ERGIC vesicles fuse with each other to form the cis-Golgi complex (Hauri et al., 2000; Ben-Tekaya et al., 2005). We stained GFP-TC48-expressing cells with antibody against

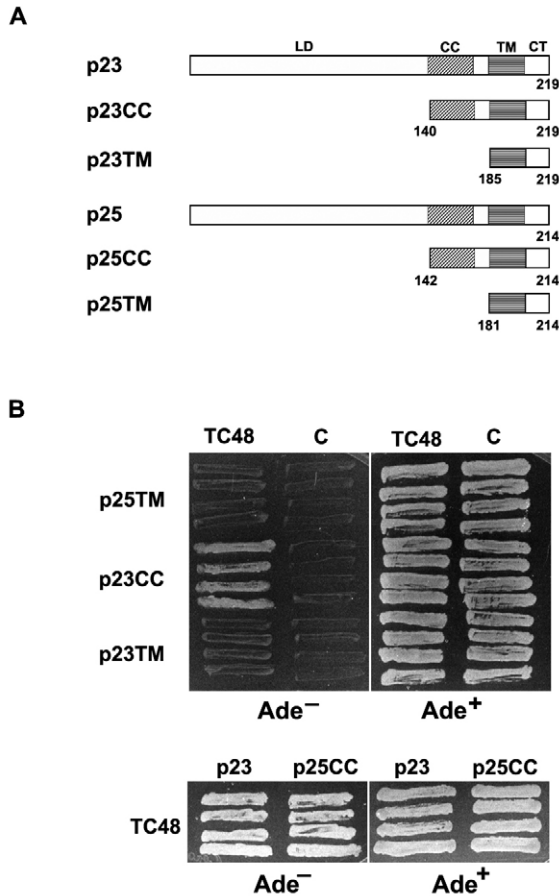

**Fig. 2.** Interaction of C-terminal sequences in p23 and p25 with TC48. (A) Schematic representation of p23 and p25 and various deletion mutants cloned in yeast vector pAct-II. LD, luminal domain; CC, coiled-coil domain; TM, transmembrane domain; CT, cytoplasmic tail. (B) Yeast strain PJ69-4A was co-transformed with TC48 (cloned in pGBKT-7) and various mutants of p23 or p25. Transformants were grown on plates with (Ade<sup>+</sup>) or without adenine (Ade<sup>-</sup>).

ERGIC-53 (a known ERGIC marker protein) and found that ERGIC-53 colocalized with GFP-TC48 (Fig. 4B). The localization of GFP-TC48 in the Golgi and ERGIC was not due to the presence of the GFP tag because HA-tagged TC48 also showed a similar subcellular localization (data not shown). The Golgi localization of TC48 was observed even in those cells which expressed very low levels of this protein, therefore, suggesting that the Golgi localization is not due to an overflow of excessive amounts of overexpressed protein.

At 15°C, the ER-to-Golgi transport of the anterograde transport marker protein VSVG is blocked in the ERGIC. HA-tagged TC48 and VSVG-GFP expression plasmids were co-transfected in Cos-1 cells, and after 15 hours at 40°C were incubated for a further 3 hours at 15°C. VSVG-GFP showed a punctate staining pattern (typical of ERGIC) in most of the cells (Fig. 4C) as expected. Some TC48 colocalized in these VSVG-GFP-rich structures (Fig. 4C), suggesting that a fraction of TC48 accumulates in the ERGIC at 15°C.

#### TC48 moves between Golgi and ER

During the localization studies of TC48 we made an interesting

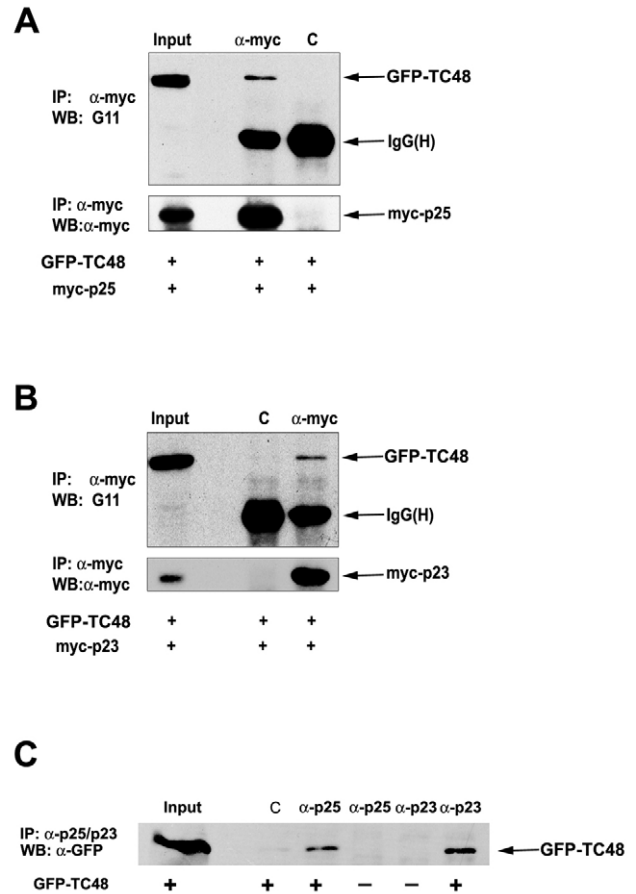

**Fig. 3.** Western blots of cell lysates and immunoprecipitates (IP). Interaction of TC48 with p23 and p25 in mammalian cells. Cos-1 cells were co-transfected with GFP-TC48 and myc-p25 (A), or GFP-TC48 and myc-p23 (B) expression constructs. After 36 hours of transfection, cell lysates were prepared and immunoprecipitation with anti-myc or control antibody was performed as described in Materials and Methods. Input is 5% of the total cell lysate; IgG(H) is the band generated by the heavy chain of antibodies used for immunoprecipitation. G11 is the mouse monoclonal antibody that recognizes overexpressed TCPTP. (C) Cos-1 cells were transfected with GFP-TC48 and, after 36 hours, cell lysates were subjected to immunoprecipitation with control antibody (C) or antisera that recognize native p23 or p25 proteins. Western blot of immunoprecipitates was done with GFP monoclonal antibody. Lysates from untransfected cells were also used as controls for immunoprecipitation.

observation. Upon overexpression, TC48 initially showed predominant localization to the Golgi complex in most of the cells. However, at later time points (24-48 hours after transfection) it showed progressively increased levels in ER. Cos-1 cells were transfected with GFP-TC48 and cells were fixed 12, 24 or 48 hours after transfection. These cells were stained with antibody against the Golgi marker giantin. At 12 hours after transfection the majority of the cells showed TC48 predominantly in the Golgi complex. However, the number of cells showing a predominant Golgi localization decreased progressively with time. Representative areas of transfected cells showing localization of TC48 are shown in Fig. 4A. Colocalization with the Golgi marker giantin by confocal

microscopy confirmed that TC48 was indeed present in the Golgi. These observations suggest that TC48 moves from Golgi to ER. We further used the protein synthesis inhibitor cycloheximide to examine its effect on localization of TC48. Cos-1 cells were transfected with GFP-TC48 for 12 hours, incubated with cycloheximide for 6 hours and then fixed. Fixed cells were stained with giantin and calnexin (an ER marker) antibodies. The cycloheximide-treated cells showed predominant ER localization of TC48, as shown by increased colocalization with calnexin (Fig. 5A, lower panel), with little staining in the Golgi (Fig. 5A, upper panel). Cycloheximide treatment did not have any visible effect upon localization of giantin. These results suggest that, after its synthesis, TC48 moves from the ER to the Golgi and then back to the ER, possibly by a process of selective retrieval.

Microtubule-dependent transport of vesicles occurs between ER and Golgi compartments. Nocodazole treatment of cells is known to inhibit microtubule-dependent transport processes, leading to disintegration of the Golgi complex. The effect of

nocodazole on TC48-expressing cells was examined after 12 hours of transfection. Nocodazole treatment for 2 hours resulted in the accumulation of GFP-TC48 in many vesicle-like structures throughout the cell (Fig. 5B) and also in tubular remnants of the Golgi complex, as seen by colocalization with giantin. We also checked the effect of another Golgi-perturbing drug brefeldin A (BFA) upon localization of TC48. BFA blocks budding and formation of transport vesicles by inhibiting Arf1 and leads to redistribution of Golgi enzymes to ER, resulting in the disassembly of Golgi stacks (Klausner et al., 1992). BFA treatment for 30 minutes disturbed the Golgi localization of TC48, indicating that the Golgi pool of TC48 is present in BFA-sensitive Golgi compartments (Fig. 5B).

Since TC48 interacts with p25 and p23, we examined the possibility of their colocalization in the cell. GFP-TC48 expressed in Cos-1 cells showed partial colocalization with endogenous p23 in the Golgi after 24 hours of transfection (Fig. 6A). Endogenous p25 also showed partial colocalization with GFP-TC48 in the Golgi (Fig. 6D).

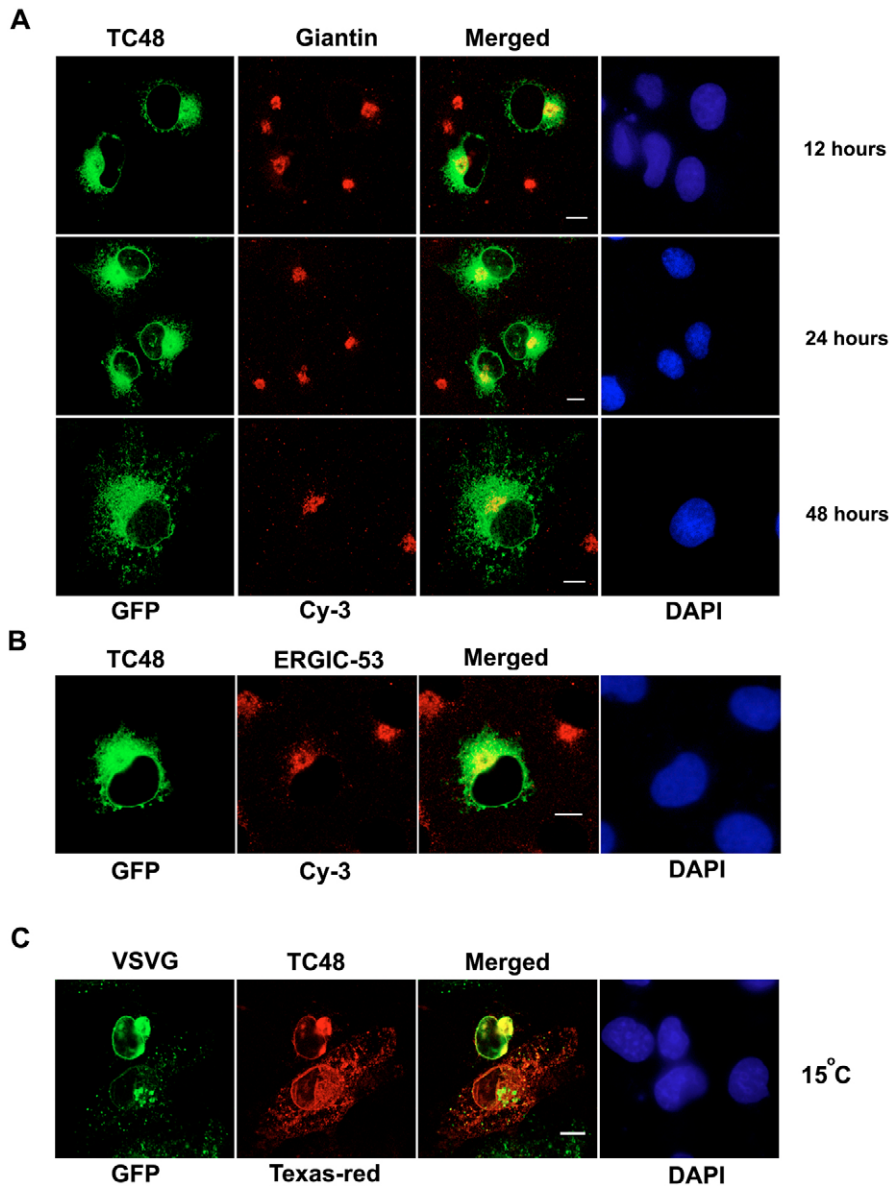

**Fig. 4.** Time course of TC48 localization in Cos-1 cells. (A) Cos-1 cells transfected with GFP-TC48 were fixed at 12 hours, 24 hours and 48 hours after transfection and stained with anti-giantin mouse monoclonal antibody (red) to stain the Golgi complex, and observed by confocal microscopy. Yellow colour generated in the merged images indicates colocalization of TC48 and Golgi-localized giantin. Notice the progressive increase of GFP-TC48 localization in ER-like reticular structures with increasing time. (B) Cos-1 cells overexpressing GFP-TC48 were fixed after 12 hours of transfection and stained with mouse monoclonal anti-ERGIC-53 antibody. Cy3-conjugated secondary antibodies were used to visualize ERGIC (red). Yellow colour generated in the merged image indicates colocalization of TC48 and ERGIC-localized ERGIC-53. (C) Cos-1 cells were transfected with plasmids expressing VSVG-GFP and HA-TC48. After 15 hours at 40°C, the cells were shifted to 15°C for 3 hours. Cells were fixed and stained with HA-tag antibody (red) and analyzed by confocal microscopy. Bars, 10  $\mu$ m.

### p23 and p25 affect TC48 localization

The p24 family members p23 and p25 are believed to be involved in biosynthetic transport of proteins. Since TC48 interacted with p23 and p25 we examined the localization of TC48 upon coexpression of p23 and p25. For this purpose Cos-1 cells were transfected with GFP-TC48 and myc-p23, which expresses mature p23 protein tagged with c-myc. This construct also expresses a signal peptide that precedes the myc-tag (Rojo et al., 2000). Myc-p23 was localized to membranous structures in majority of the cells (Fig. 6B) as shown by others (Rojo et al., 2000). TC48 showed colocalization with p23 in

these perinuclear membranous structures as shown by the yellow colour in the merged image (Fig. 6B). This is probably not an artifact of overexpression because previously it has been shown that overexpression of this myc-p23 protein results in the formation of similar membranous structures which selectively relocalize endogenous p23 to these structures without altering the distribution of other Golgi proteins or other members of p24 family (Rojo et al., 2000). This result indicated that p23 interacts with TC48 *in vivo*. A mature form of rat p23 tagged with GFP at the N-terminus has been shown to localize to the cis Golgi network and the intermediate compartment (Blum et al., 1999). This GFP-p23 construct does not contain the signal peptide. GFP-p23 was co-transfected with rat TC48 in Cos-1 cells and after 24 hours the cells were stained with G11 monoclonal antibody, which recognizes TC48. Expression of GFP-p23 did not appear to affect localization of TC48, which showed colocalization with GFP-p23 (Fig. 6C).

To determine the effect of coexpression of p25 on TC48 localization, cells were transfected with GFP-TC48 and myc-p25, fixed and stained after 12 hours of transfection. Most of the cells expressing p25 and TC48 showed predominant localization of TC48 in the ER (Fig. 6E), whereas cells transfected with TC48 alone showed predominant Golgi localization (Fig. 4). Overexpressed p25 has been shown to be present predominantly in the ER and nuclear membrane (Dominguez et al., 1998; Emery et al., 2000). TC48 showed strong colocalization with p25 as seen by the yellow colour in the merged image (Fig. 6E). These results suggest that TC48 interacts with p25 *in vivo* and p25 is involved in targeting TC48 to ER.

The p25 protein has an ER-retrieval di-lysine

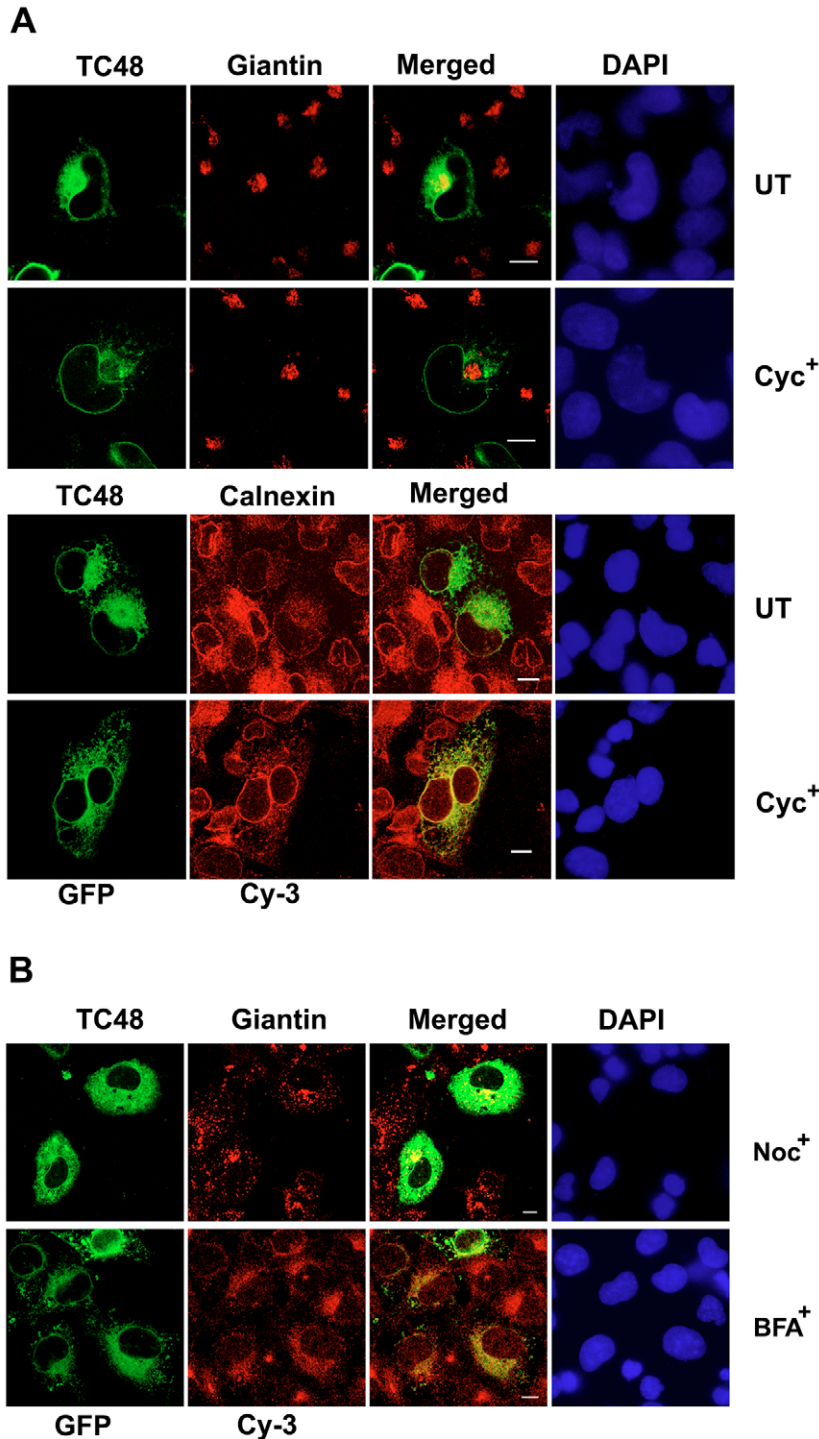

**Fig. 5.** Effects of drugs on the localization of TC48. (A) Cycloheximide-chase causes depletion of the Golgi pool of TC48. Cos-1 cells transfected with GFP-TC48 were allowed to express the exogenous cDNA for 12 hours at 37°C after which incubation was continued in the presence of cycloheximide (10 μg/ml) for 6 hours (Cyc<sup>+</sup>) and in the absence of cycloheximide (UT). Cells were fixed and stained with anti-giantin mouse monoclonal antibody (red) to stain the Golgi complex and observed by confocal microscopy (upper panels). Yellow colour in merged images indicates colocalization of TC48 and Golgi-localized giantin, and is evident in untreated cells (UT) but not in cells chased for 6 hours with cycloheximide (Cyc<sup>+</sup>). Notice, after 6 hours of cycloheximide-chase the Golgi pool of TC48 appears depleted. GFP-TC48 transfected and cycloheximide-treated or untreated cells were also stained with calnexin (ER marker) antibody (lower panels). (B) Nocodazole and BFA disturb the Golgi localization of TC48. Cos-1 cells expressing GFP-TC48 were treated, after 12 hours of transfection, with 5 μg/ml nocodazole at 37°C for 2 hours (Noc<sup>+</sup>) or with 5 μg/ml BFA for 30 minutes (BFA<sup>+</sup>). After fixation, cells were stained with giantin antibody and visualized by confocal microscopy. Bars, 10 μm.

motif (KKxx) at its C-terminus. Inactivation of this di-lysine motif results in targeting of overexpressed mutant protein p25SS to Golgi and plasma membrane (Emery et al., 2003). We examined the effect of p25SS on subcellular localization of GFP-TC48. Coexpression of p25SS resulted in enhanced localization of GFP-TC48 to the Golgi (Fig. 6F) where it colocalized with p25SS. Most of the p25SS was present in the Golgi region, although some amount of p25SS was seen at the plasma membrane after 12 hours of transfection. After 24 hours of transfection the amount of p25SS increased in the plasma membrane but we could not detect GFP-TC48 in the plasma membrane. Inability of p25SS to target GFP-TC48 to

ER and enhanced localization of TC48 in the Golgi suggest that the di-lysine motif (of p25) is essential for p25 to target TC48 to ER.

#### Different regions of TC48 interact with p23 and p25

Since p23 and p25 coexpression resulted in targeting of TC48 to distinct subcellular locations we reasoned that p23 and p25 might interact with different regions of TC48 within the C-terminal 66-aa domain. Therefore, a smaller construct of TC48 was made in which the C-terminal 40 aa (C-40) of TC48 were fused with the Gal4-DNA-binding domain. This protein interacted with p23 quite well in the yeast two-hybrid system (Fig. 7A). By contrast, the p25 protein showed insignificant interaction with the C-terminal 40 aa of TC48. The C-40, C-66 and full-length TC48-Gal4 DNA-binding-domain fusion constructs did not show any interaction with the protein expressed by the control plasmid (Fig. 7A). The interaction of p25 and p23 with GFP-C66 and GFP-C40, respectively, was confirmed in mammalian cells by coimmunoprecipitation experiments (Fig. 7B).

#### Interaction with p25 is essential for the targeting of TC48 to the ER

The interaction of p23 and p25 with different regions of TC48 within the C-terminal 66-aa domain suggested that these interactions are playing a role in transporting and/or targeting this protein to specific subcellular locations. Therefore, we made vectors expressing GFP fusion proteins with C-terminal sequences of TC48. Cos-1 cells were transfected with these expression plasmids and after 12, 24 and 48 hours of transfection, the cells were examined for subcellular location of these proteins. GFP-C66 protein (C-terminal 66 aa of TC48 fused with C-terminus of GFP) showed significant Golgi localization after 12 hours and then showed progressive increase in localization to the ER as observed with full-length TC48. The GFP-C40 protein showed predominantly Golgi localization after 12, 24 or 48 hours of transfection. A representative field is shown at 24 hours of transfection for GFP-C40

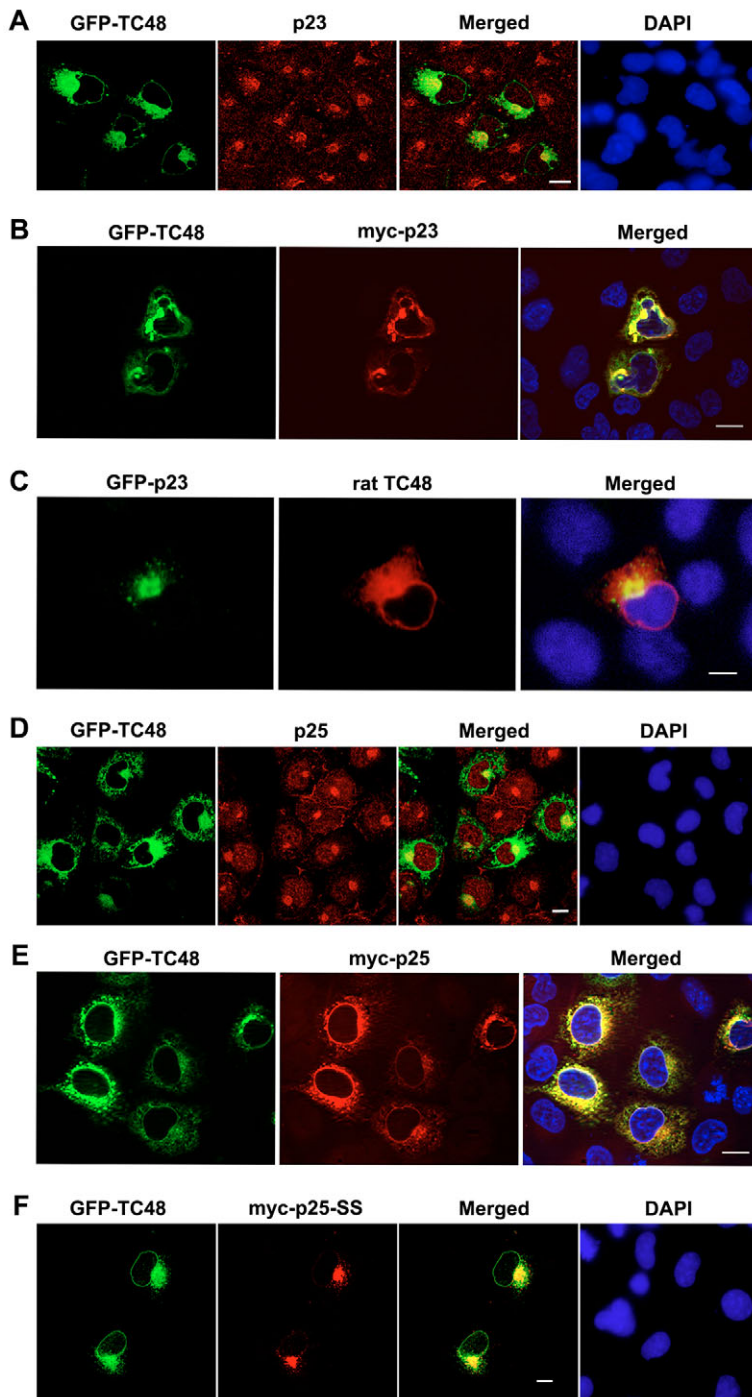

**Fig. 6.** Overexpression of p23 and p25 affect localization of TC48. GFP-TC48 was transfected in Cos-1 cells; after 24 hours cells were stained with antibodies that recognize endogenous p23 (A) or p25 (D). Stained cells were examined by confocal microscopy. Cos-1 cells were co-transfected with GFP-TC48 and myc-p23 (B) or myc-p25 (E) and fixed after 12 hours of transfection. Fixed cells were stained with anti-myc mouse monoclonal antibody and Texas-Red-conjugated secondary antibody to visualize p23 and p25 proteins. The images shown are the middle optical sections taken, using the apotome fluorescence microscope. (C) GFP-p23- and rat TC48-expression plasmids were co-transfected in Cos-1 cells. After 24 hours cells were fixed, stained with G11 monoclonal antibody (red) and visualized by confocal microscopy. (F) Cells were transfected with myc-p25SS and GFP-TC48 and processed as in (E) after 12 hours of transfection. Bars, 10  $\mu$ m.

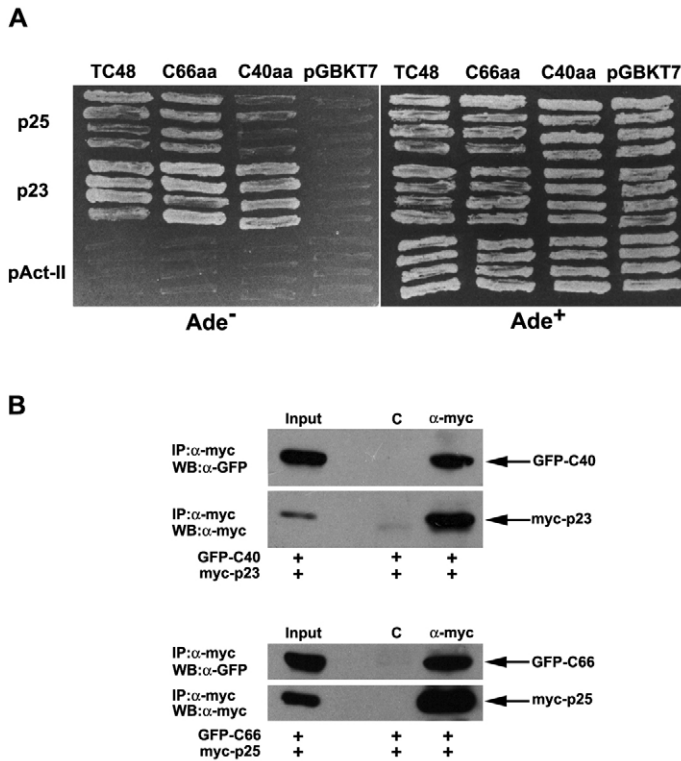

**Fig. 7.** Interaction of C-terminal sequences of TC48 with p23 and p25. (A) Yeast two-hybrid analysis was performed between various N-terminal deletion mutants of TC48 and p23 (pAct-II) or p25 (pAct-II). TC48 is the full-length TC48, whereas C40aa and C66aa are the C-terminal 40 aa and 66 aa of TC48 fused with the DNA-binding domain of Gal4 in pGBKT-7 (bait vector). pGBKT-7 and pAct-II are the empty Gal4-DNA-binding domain and Gal4-activation-domain-containing yeast two-hybrid expression vectors, respectively. (B) Cos-1 cells were co-transfected with GFP-C40 and myc-p23 (upper panels) or GFP-C66 and myc-p25 (lower panels) expression plasmids. After 36 hours cell lysates were prepared and immunoprecipitated with myc antibody or control antibody (C). Western blots of cell lysates and immunoprecipitates (IP) with GFP and myc antibodies are shown. Input is 5% total cell lysate.

and GFP-C66 proteins (Fig. 8A,B). The localization of GFP-C40 in Golgi was confirmed by colocalization with giantin after 24 hours of transfection (Fig. 8A). These results suggested the absence of some ER retention or ER targeting signal in the GFP-C40 protein. The GFP-C66 protein showed good colocalization with myc-p25 in cells expressing these two proteins (Fig. 8C). Our results suggest that the C-terminal 66 aa of TC48 are sufficient for interaction with p25 and also for targeting GFP to the ER. The C-terminal 40 aa of TC48, which interact with p23 but not with p25, are not sufficient for targeting GFP to the ER. Taken together, these results suggest that interaction with p25 plays an essential role in targeting GFP-C66 and, perhaps, full-length TC48 to the ER. Since endogenous p23 protein is present predominantly in the cis Golgi network (Rojo et al., 1997; Sohn et al., 1996) the targeting of GFP-C40 to the Golgi complex might be due to its interaction with p23. This hypothesis was tested by coexpressing myc-p23 with GFP-C40, which resulted in trapping of GFP-C40 in the p23-rich membranes (Fig. 8D).

## Discussion

In general, ER-localization of ER-resident proteins occurs by two different mechanisms: (1) failure of the proteins to be recognized by ER-export machinery and (2) selective retrieval of proteins from post-ER compartments such as ERGIC or cis-Golgi though some proteins seem to exit the ER by a nonselective process (bulk flow) (Wieland et al., 1987; Harter and Wieland, 1996). The protein tyrosine phosphatase TC48 has been shown by Lorenzen et al. to localize in the ER through ER retention signals located in the C-terminal 70 aa; they studied the localization of overexpressed TC48 after 64 hours of transfection in Cos-1 cells (Lorenzen et al., 1995). In the present study, we observed that TC48 shows significant localization to Golgi complex and ERGIC after 12-24 hours of transfection, as determined by colocalization with giantin and ERGIC-53. There was progressive increase in ER localization with time and predominant ER localization was shown after 48 hours of transfection. Accumulation of TC48 was seen in ERGIC at 15°C. These results suggest that, after synthesis, the TC48 protein moves from ER to ERGIC and Golgi complex through the biosynthetic protein transport machinery and then it is retrieved into ER. This suggestion is supported by the observation that, upon treatment with cycloheximide, TC48 is largely depleted from the Golgi. Association of TC48 with the Golgi complex is also supported by the observation that GFP-C40 localizes primarily to the Golgi showing the presence of ER export signal as well as a Golgi localization signal in the C-terminal 40 aa of TC48.

### Role of p25 in targeting of TC48 to ER

The transmembrane proteins p25 and p23 were found to interact with TC48 in yeast as well as in mammalian cells. Colocalization experiments suggest that TC48 interacts with p25 and p23 *in vivo*. This interaction was specific and mediated by C-terminal sequences of TC48. The p25 and p23 proteins (and other p24 family proteins) have been reported to play a role in protein transport in early biosynthetic pathways (Kaiser, 2000; Nickel et al., 2002). For p25 protein two different roles have been suggested. p25 has been shown to control the fidelity of membrane transport by maintaining cholesterol-poor membrane in the Golgi complex. p25 protein has the intrinsic capacity to form highly specialized domains that control membrane composition and dynamics. In addition, p25 protein also plays a crucial role in the retention of members of p24 family in early biosynthetic membranes, presumably by anchoring them in the COP-I recycling pathway (Emery et al., 2003). Based on the results presented here, we suggest that p25 protein plays an important role in targeting TC48 to the ER by direct binding. This suggestion is supported by the following observations: (1) p25 interacts with the same C-terminal sequence of TC48 that is sufficient for targeting to the ER; (2) coexpression of p25 enhances ER localization of TC48; (3) coexpression of a p25 mutant that is defective in the ER-retrieval di-lysine motif is unable to enhance ER localization of TC48. Instead, Golgi localization of TC48 is increased in the presence of this mutant p25. Additional support is provided by the observation that the C-terminal 40 aa of TC48, which are not sufficient for interaction with p25, do not target GFP to the ER. Instead, the GFP-C40 protein ends up in the Golgi.



## Possible role of p23 in biosynthetic transport of TC48

Although the interaction of TC48 with p25 protein appears to play an important role in targeting TC48 to the ER, the significance of interaction with p23 is not clear. Endogenous p23 protein is present in the cis-Golgi network in high amount (Sohn et al., 1996; Rojo et al., 1997; Barr et al., 2001). Therefore, one possibility is that the interaction with p23 plays a role in transporting or targeting TC48 to the Golgi. Some support for this suggestion is provided by the observation that the C-terminal 40 aa of TC48, which are sufficient for interaction with p23, are also sufficient for targeting GFP to the Golgi complex. Since p23 binds to coatamers and is enriched in COPI vesicles (which are involved in retrograde transport), p23 by itself or together with p25 is probably

involved in the retrieval of TC48 from the Golgi and other post ER compartments to the ER. An indication for the role of endogenous p23 for proper subcellular targeting of TC48 is provided by the following observation. Overexpression of myc-p23 results in trapping of TC48 (and GFP-C40) in myc-p23-rich membranous structures. Previously it has been shown that, expression of myc-p23 selectively relocalizes endogenous p23 to the myc-p23-rich membranous structures without altering the distribution of other Golgi proteins or other members of p24 family (Rojo et al., 2000). Therefore, trapping of TC48 in p23-rich membranous structures indicates a requirement of endogenous p23 in cis Golgi for proper subcellular targeting of TC48.

Previously it has been shown that, the C-terminal hydrophobic tail and residues within the region 346-358 must act in concert to target TC48 to the ER (Lorenzen et al., 1995). The hydrophobic tail lies in the region of TC48 that interacts with p23 (our data). The second ER-targeting sequence (346-358 aa) identified by Lorenzen et al. (Lorenzen et al., 1995) overlaps with the region required for interaction with p25. Therefore, it seems likely that interactions with both p23 and p25 play a role in targeting and/or transporting of TC48 to Golgi and ER. Our results suggest that the C-terminal 66 aa of TC48 that begin at residue 350 are sufficient to target GFP to the ER, whereas Lorenzen et al. found that internal deletion of residues 346-349 in a 100-aa construct (316-415 aa) results in loss of ER retention of  $\beta$ -galactosidase (Lorenzen et al., 1995). This apparent discrepancy may be due to the requirement of residues 346-349 for proper folding of TC48.

It is worthwhile to mention that the fusion protein of GFP and the C-terminal

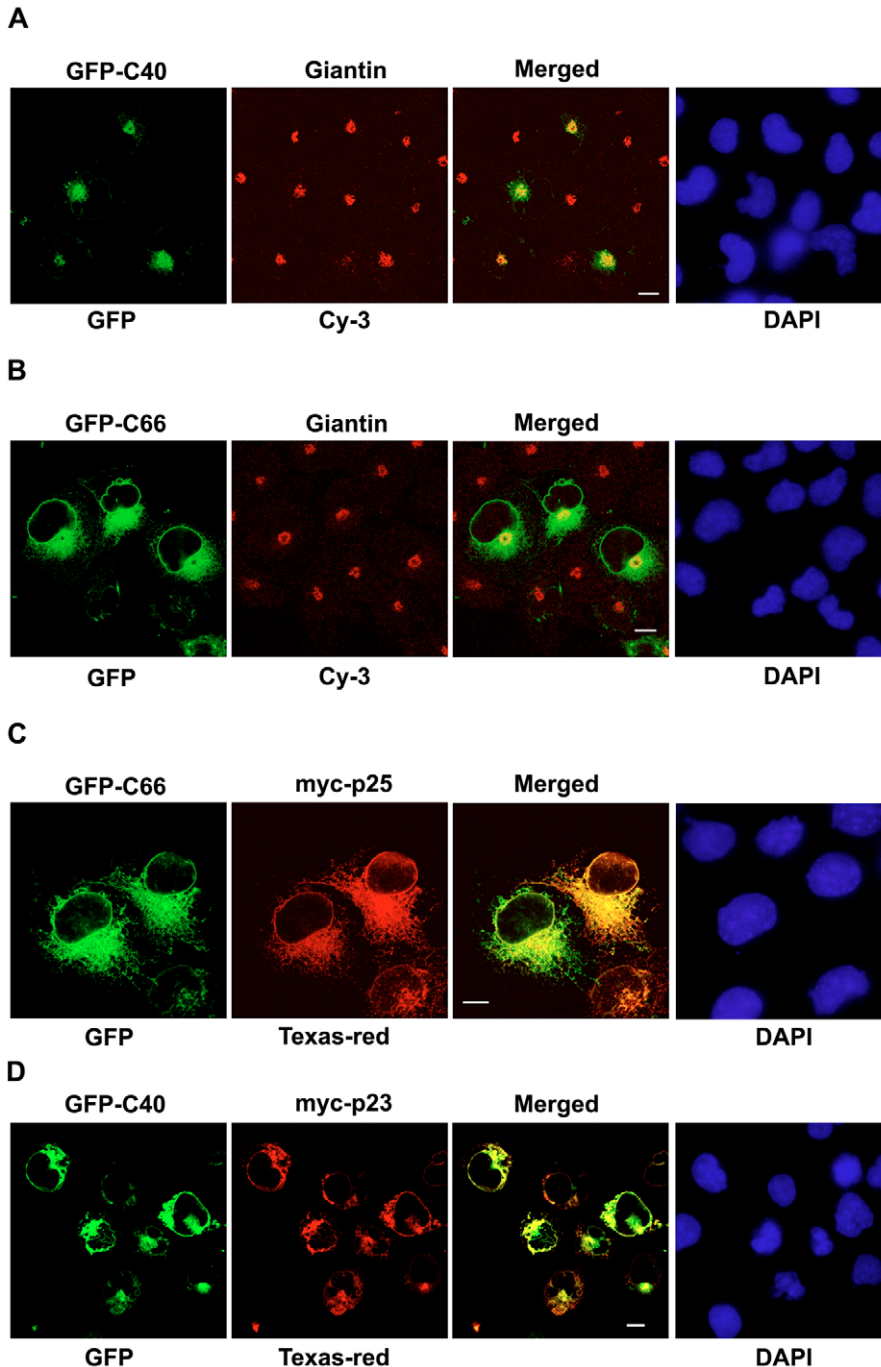

**Fig. 8.** Localization of GFP-C40 and GFP-C66 fusion proteins. Cos-1 cells transfected with vectors expressing GFP-C40 (A) or GFP-C66 (B) were allowed to express exogenous cDNA for 24 hours. Cells were fixed and stained with anti-giantin mouse monoclonal antibody (red) to stain the Golgi complex, and observed by confocal microscopy. Yellow colour indicates colocalization of GFP-C40 or GFP-C66 and Golgi-localized giantin. (C) GFP-C66 and myc-p25 expression plasmids were co-transfected in Cos-1 cells; after 12 hours of transfection the cells were fixed, stained with anti-myc antibody (red) and observed by confocal microscopy. (D) GFP-C40 and myc-p23 expression plasmids were co-transfected in Cos-1 cells; after 12 hours of transfection the cells were fixed, stained with myc antibody (red) and observed by confocal microscopy. Bars, 10  $\mu$ m.

40 aa of TC48 shows prominent Golgi localization, indicating that the C-terminal 40 aa of TC48 contain some ER-export signals. By carefully analyzing the sequence of TC48, we found that it does contain three known ER-export motifs, a di-basic RR-motif (RKRKR) at the start of this 40 aa sequence, a Yxx $\phi$  motif (YWQP) adjacent to the RR motif and the diphenylalanine motif (FFQQNAL) at the extreme C-terminus of this 40-aa sequence (Fiedler et al., 1996; Marks et al., 1997; Sevier et al., 2000; Giraudo et al., 2003). Presence of these ER-export motifs indicates the possible functional significance of TC48 localization in post ER-compartments where TC48 might regulate some Golgi-emanated signal transduction pathways. Recently, there have been reports from various laboratories regarding the role of Golgi-associated proteins in regulating various cellular functions (Donaldson and Lippincott-Schwartz, 2000; Preisinger and Barr, 2001; Alton-Bonnet et al., 2003; Alton-Bonnet et al., 2004). The Src family kinases Hck and Src are present to some extent in the Golgi complex (Carreno et al., 2000; Bard et al., 2002; Radha et al., 2004). Tyrosine phosphorylation might be involved in pathways regulated by these kinases (Bard et al., 2003), which might be affected by Golgi-localized TC48.

How does p25 help in targeting of TC48 to the ER? There are at least two possibilities: (1) p25 might be involved in anchoring TC48 to the ER or (2) it might transport TC48 to the ER from post-ER compartments. These two possible explanations are not necessarily mutually exclusive. The known properties of p25 and p23 suggest that both proteins are probably involved in transporting TC48 to its proper subcellular locations.

In summary, this article is the first report to show a physical interaction of the p24-family member p25 with a cargo protein, TC48, in vivo in mammalian cells and adds on the suggested role of p24-family members p23 and p25 in vesicular transport of proteins between Golgi and ER. The interaction with p25 plays a crucial role in the targeting of TC48 to ER and the interaction with p23 might be involved in taking TC48 through the Golgi also helping in targeting it to the ER. The interactions with TC48 provide a model to further study the details of the mechanism by which p25 and p23 transport and target a cellular protein to ER and Golgi in mammalian cells. This manuscript also sheds light on the possible role of p24-family proteins in targeting cell signaling molecules to the organelles of the early secretory pathway.

## Materials and Methods

### Cell culture and transfections

Cos-1 cells were grown as monolayers in a humidified atmosphere of 5% CO<sub>2</sub> at 37°C in Dulbecco's Minimum Essential Medium (DMEM) containing 10% FCS, 100 U/ml penicillin and 100  $\mu$ g/ml streptomycin. Transfections were performed on cells grown as a monolayer in either 60-mm dishes or glass coverslips using the cationic lipid DHDEAB as described (Banerjee et al., 1999; Radha et al., 2004). Briefly, 1  $\mu$ l lipid diluted in 50  $\mu$ l serum-free DMEM was mixed with 1  $\mu$ g DNA in 50  $\mu$ l serum-free DMEM. The mixture was kept at room temperature for 30 minutes to allow complex-formation before adding it to the (60–80% confluent) cell monolayer. Cells were fed with serum 4 hours later and harvested at indicated time points after transfection. Cycloheximide (10  $\mu$ g/ml, Sigma), nocodazole (5  $\mu$ g/ml, Calbiochem) or brefeldin A (BFA, 5  $\mu$ g/ml, Sigma) were added to the medium at indicated concentrations.

### Antibodies

Mouse monoclonal anti-HA and anti-myc antibodies were from Roche Molecular Biochemicals and Oncogene Research Products, respectively. The mouse monoclonal G11, which recognizes rat TC45, TC48, overexpressed human TC45 and TC48 proteins, was made in our laboratory (Radha et al., 1994). Mouse

monoclonals anti-ERGIC-53 and anti-giantin were kind gifts from Hans-Peter Hauri (Biocentre, Basel, Switzerland) (Schweizer et al., 1988; Linstedt and Hauri, 1993). Rabbit antisera that recognize p23 and p25 proteins were kindly provided by Felix T. Wieland (Heidelberg, Germany) and have been described before (Jenne et al., 2002). Cy-3-conjugated anti-mouse and anti-rabbit IgGs were from Amersham. Texas-Red-conjugated anti-mouse and anti-rabbit IgGs were from Vector Labs.

### Expression vectors

All cloning experiments were performed according to standard procedures. Full-length TC48 was amplified from a cloning-vector clone containing full-length TC-PTP (Cool et al., 1989), with gene-specific primers containing *Eco*RI and *Sall* restriction sites at its ends. The resulting PCR product was cloned in the pMOS cloning vector (Amersham) and its sequence was verified by automated sequencing. TC48 cDNA was excised with specific restriction enzymes and cloned in the yeast two-hybrid expression vector pGBKT-7 (Clontech), mammalian expression vectors pcDNA 3.1 (HA) (Invitrogen) and pEGFP-C3 (Clontech). TC45 cDNA was cloned in various vectors the same way as TC48. DNA sequences coding for the C-terminal 66 aa or 40 aa of TC48 were amplified with specific primers and cloned in the yeast two-hybrid expression vector pGBKT-7 and also in the GFP-expression plasmid pEGFP-C2. The constructs in pEGFP-C2 produce GFP-C66 and GFP-C40, in which the C-terminal 66 aa or 40 aa of TC48 are fused at the C-terminus of GFP. The nucleotide sequence of all constructs was confirmed by automated DNA sequencing. Rat TC48 cloned in the mammalian expression vector pCB6 has been described before (Kamatkar et al., 1996). Myc-p23, myc-p25 and myc-p25SS (in which the ER-retrieval motif KKxx is inactivated by mutation of KK to SS) expression plasmids have been described before (Emery et al., 2000; Rojo et al., 2000) and were kindly provided by Jean Gruenberg (University of Geneva, Switzerland). These plasmids express mature human p23 and p25 proteins with a myc-tag at the N-terminus of the molecule. The myc-tag is preceded by the signal peptide. The GFP-p23 expression plasmid, which expresses the mature form of rat p23 tagged with GFP at the N-terminus was kindly provided by Irene Schulz (University of Saarland, Germany) (Blum et al., 1999). This construct does not contain a signal peptide. Smaller constructs of p23 and p25 were prepared by amplifying the required region by PCR and cloning in the *Eco*RI and *Xho*I sites of pAct-II. A GFP-labeled vesicular stomatitis virus G-protein (VSVG-GFP tsO45) expression plasmid was kindly provided by Jennifer Lippincott-Schwartz (NIH, Maryland, USA) and has been described before (Presley et al., 1997).

### Yeast two-hybrid screening

The full-length TC48 protein was used as a bait. Yeast strain PJ69-4A was used for two-hybrid analysis (James et al., 1996). Expression of TC48 fused to the Gal4-DNA-binding domain (expressed by the construct in a pGBKT-7 vector) was checked in western blot with lysates from yeast cultures grown in Trp dropout liquid culture. The TC48 (pGBKT-7)-expressing PJ69-4A strain was then transformed with human placental cDNA library (Clontech). Transformants were plated on yeast dropout medium lacking Trp, Leu and Ade. A small part (0.1%) of transformant mix was plated to determine the efficiency of transformation on the Leu and Trp dropout medium plate. The positives obtained on Trp<sup>-</sup>, Leu<sup>-</sup> and Ade<sup>-</sup> plates were checked for the activation of  $\beta$ -galactosidase reporter gene by plating them on plates containing Trp and Leu dropout medium adjusted to pH 7.0 and  $\beta$ -galactosidase substrate. Plasmids were isolated from positive yeast colonies, propagated in *E. coli* and then sequenced. The interactions were confirmed by retransformation of positive clones with TC48 or control plasmids. Yeast culture reagents and media were obtained from Himedia and Sigma.

### Indirect immunofluorescence and confocal microscopy

Indirect immunostaining of cells and microscopy was carried out essentially as described (Kamatkar et al., 1996; Radha et al., 2004). Cells grown on coverslips were fixed in 3.5% formaldehyde in phosphate-buffered saline (PBS) pH 7.4 for 10 minutes at room temperature and then washed thrice in PBS buffer. Fixed cells were permeabilized for 6 minutes in PBS containing 0.5% Triton X-100 (Sigma) and 0.05% Tween-20 (Sigma). Permeabilized cells were washed thrice in PBS and incubated with 2% BSA (Sigma) in PBS for 1 hour. Following this, the cells were incubated with primary antibodies diluted in blocking solution for 1 hour at room temperature. Antibodies were removed and the cells were washed with PBS three times. Cells were then incubated with secondary antibodies for 1 hour at room temperature, washed three times in PBS and finally in H<sub>2</sub>O. Labeled cells were mounted in Vectashield mounting medium containing DAPI (Vector labs). Colocalization was determined by observing the staining patterns, with the LSM 510 Meta Confocal Microscope from Carl Zeiss. Serial optical sections in the Z-axis of the cell were collected at 0.33  $\mu$ m or 0.5  $\mu$ m intervals with 63 $\times$  oil immersion objective lens (NA 1.4). Then, two to three middle optical sections were projected and colocalization was observed in a total thickness of 1  $\mu$ m by using LSM 510 (version 3.2) software. Immunofluorescence staining and colocalization was also observed with a Zeiss Axioplan2 microscope fitted with an Apotome. The apotome (from Carl Zeiss Microimaging) is a new 3D imaging system for contrast-enhancement in fluorescence microscopy. It uses structured illumination to reject signals belonging to regions of the sample that are outside the best focus position

of the microscope. Images were captured using the Axiocam (Zeiss) CCD camera and processed with Axiovision 4 software.

### Coinmunoprecipitation and western blotting

Cos-1 cells in 60-mm dishes were co-transfected with GFP-TC48 and myc-p23 or myc-p25 (pCB6). Thirty six hours later, cells were washed twice with ice-cold PBS and then lysed at 4°C for 20 minutes in lysis buffer containing 25 mM Tris-HCl, pH 7.4, 150 mM NaCl, 1.0% Triton X-100, 1 mM PMSF, 0.1% BSA, 5 mM EDTA and protease inhibitor cocktail (Roche Biochemicals). Lysates were centrifuged at 10,600 g for 10 minutes at 4°C and the supernatant was used for immunoprecipitation using 2 µg of c-myc monoclonal antibody or 2 µg of normal mouse IgG as control antibody. Supernatants were incubated overnight with antibodies. Then, 20 µl protein A/G plus agarose beads (Santa Cruz) were added for another hour at 4°C. After three washes in wash buffer (20 mM Hepes pH 7.4, 0.1% Triton X-100, 150 mM NaCl, 10% glycerol, 1 mM PMSF, protease inhibitors) and after adding 20 µl of 2× SDS-PAGE sample buffer, the beads containing immune-complexes were boiled. The samples were resolved on 10% SDS-PAGE and transferred to nitrocellulose membrane for western blot analysis. For western blot analysis, membranes were blocked with 5% nonfat dried milk (Santa Cruz) in TBST (10 mM Tris-HCl, pH 8.0, 150 mM NaCl, 0.05% Tween 20) and immunostained with the required primary antibodies. Membranes were then washed three times with TBST and incubated with anti-mouse secondary antibodies (1:5000, Amersham) conjugated to horseradish peroxidase. Bands were visualized with the ECL western blotting detection system (NEN Life Sciences).

We are grateful to H.-P. Hauri, J. Gruenberg, F. T. Wieland, I. Schulz, J. Lippincott-Schwartz and Utpal Tatu for providing reagents. We thank V. Radha for critical reading of the manuscript and Nandini Rangaraj for help in confocal microscopy. V.G. gratefully acknowledges the Council of Scientific and Industrial Research, India for a Senior Research Fellowship.

### References

- Alton-Bonnet, N., Phair, R. D., Polishchuk, R. S., Weigert, R. and Lippincott-Schwartz, J. (2003). A role for Arf1 in mitotic Golgi disassembly, chromosome segregation, and cytokinesis. *Proc. Natl. Acad. Sci. USA* **100**, 13314-13319.
- Alton-Bonnet, N., Sougrat, R. and Lippincott-Schwartz, J. (2004). Molecular basis for Golgi maintenance and biogenesis. *Curr. Opin. Cell Biol.* **16**, 364-372.
- Banerjee, R., Das, P. K., Sri拉克shmi, G. V., Choudhari, A. and Rao, N. M. (1999). Novel series of nonglycerol based cationic transfection lipids for use in liposomal gene delivery. *J. Med. Chem.* **42**, 4292-4300.
- Bard, F., Patel, U., Levy, J. B., Horne, W. C. and Baron, R. (2002). Molecular complexes that contain both c-Cbl and c-Src associate with Golgi membranes. *Eur. J. Cell Biol.* **81**, 26-35.
- Bard, F., Mazelin, L., Pechoux-Longin, C., Malhotra, V. and Jurdic, P. (2003). Src regulates Golgi structure and KDEL receptor-dependent retrograde transport to the endoplasmic reticulum. *J. Biol. Chem.* **278**, 46601-46606.
- Barr, F. A., Preisinger, C., Kopajtic, R. and Korner, R. (2001). Golgi matrix proteins interact with p24 cargo receptors and aid their efficient retention in the Golgi apparatus. *J. Cell Biol.* **155**, 885-891.
- Belden, W. J. and Barlowe, C. (1996). Erv25p, a component of COPII-coated vesicles, forms a complex with Emp24p that is required for efficient endoplasmic reticulum to Golgi transport. *J. Biol. Chem.* **271**, 26939-26946.
- Ben-Tekaya, H., Miura, K., Pepperkok, K. and Hauri, H. P. (2005). Live imaging of bidirectional traffic from the ERGIC. *J. Cell Sci.* **118**, 357-367.
- Blum, R., Feick, P., Puypes, M., Vandekerckhove, J., Klengel, R., Nastainczyk, W. and Schulz, I. (1996). Tmp21 and p24A, two Type I proteins enriched in pancreatic microsomal membranes, are members of a protein family involved in vesicular trafficking. *J. Biol. Chem.* **271**, 17183-17189.
- Blum, R., Pfeiffer, F., Feick, P., Nastainczyk, W., Kohler, B., Schafer, K. H. and Schulz, I. (1999). Intracellular localization and in vivo trafficking of p24A and p23. *J. Cell Sci.* **112**, 537-548.
- Bordeau, A., Dube, N. and Tremblay, M. L. (2005). Cytoplasmic protein tyrosine phosphatases, regulation and function: the roles of PTP1B and TC-PTP. *Curr. Opin. Cell Biol.* **17**, 203-209.
- Bremser, M., Nickel, W., Schweikert, M., Ravazzola, M., Amherdt, M., Hughes, C. A., Sollner, T. H., Rothman, J. E. and Wieland, F. T. (1999). Coupling of coat assembly and vesicle budding to packaging of putative cargo receptors. *Cell* **96**, 495-506.
- Carney, G. E. and Bowen, N. J. (2004). p24 proteins, intracellular trafficking, and behavior: Drosophila melanogaster provides insights and opportunities. *Biol. Cell* **96**, 271-278.
- Carreno, S., Gouze, M. E., Schaak, S., Emorine, L. J. and Maridonnet-Parini, I. (2000). Lack of palmitoylation redirects p59 Hck from plasma membrane to p61 Hck-positive lysosomes. *J. Biol. Chem.* **275**, 36223-36229.
- Cool, D. E., Tonks, N. K., Charbonneau, H., Walsh, K. A., Fischer, E. H. and Krebs, E. G. (1989). cDNA isolated from a human T-cell library encodes a membrane of the protein-tyrosine phosphatase family. *Proc. Natl. Acad. Sci. USA* **86**, 5257-5261.
- Denzel, A., Otto, F., Girod, A., Pepperkok, R., Watson, R., Rosewell, I., Bergeron, J. J., Solari, R. C. and Owen, M. J. (2000). The p24 family member p23 is required for early embryonic development. *Curr. Biol.* **10**, 55-58.
- Dominguez, M., Dejgaard, K., Fullekrug, J., Dahan, S., Fazel, A., Paccaud, J. P., Thomas, D. Y., Bergeron, J. J. and Nilsson, T. (1998). gp25L/emp24/p24 protein family members of the cis-Golgi network bind both COP I and II coatomer. *J. Cell Biol.* **140**, 751-765.
- Donaldson, J. G. and Lippincott-Schwartz, J. (2000). Sorting and signaling at the Golgi complex. *Cell* **101**, 693-696.
- Elrod-Erickson, M. J. and Kaiser, C. A. (1996). Genes that control the fidelity of endoplasmic reticulum to Golgi transport identified as suppressors of vesicle budding mutations. *Mol. Biol. Cell* **7**, 1043-1058.
- Emery, G., Rojo, M. and Gruenberg, J. (2000). Coupled transport of p24 family members. *J. Cell Sci.* **113**, 2507-2516.
- Emery, G., Parton, R. G., Rojo, M. and Gruenberg, J. (2003). The transmembrane protein p25 forms highly specialized domains that regulate membrane composition and dynamics. *J. Cell Sci.* **116**, 4821-4832.
- Fiedler, K., Veit, M., Stammes, M. A. and Rothman, J. E. (1996). Bimodal interaction of coatomer with the p24 family of putative cargo receptors. *Science* **273**, 1396-1399.
- Fullekrug, J., Suganuma, T., Tang, B. L., Hong, W., Storrer, B. and Nilsson, T. (1999). Localization and recycling of gp27 (hp24gamma3): complex formation with other p24 family members. *Mol. Biol. Cell* **10**, 1939-1955.
- Galic, S., Klingler-Hoffmann, M., Fodero-Tavoletti, M. T., Puryear, M. A., Meng, T. C., Tonks, N. K. and Tiganis, T. (2003). Regulation of insulin receptor signaling by the protein tyrosine phosphatase TCPTP. *Mol. Cell Biol.* **23**, 2096-2108.
- Giraudo, C. G. and Maccioni, H. J. F. (2003). Endoplasmic reticulum export of glycosyltransferases depends on interaction of a cytoplasmic dibasic motif with Sar1. *Mol. Biol. Cell* **14**, 3753-3766.
- Harter, C. and Wieland, F. (1996). The secretory pathway: mechanisms of protein sorting and transport. *Biochim. Biophys. Acta* **1286**, 75-93.
- Hauri, H. P., Kappeler, F., Andersson, H. and Appenzeller, C. (2000). ERGIC-53 and traffic in the secretory pathway. *J. Cell Sci.* **113**, 587-596.
- James, P., Halladay, J. and Craig, E. A. (1996). Genomic libraries and host strain designed for highly efficient two-hybrid selection in yeast. *Genetics* **144**, 1425-1436.
- Jenne, N., Frey, K., Brugger, B. and Wieland, F. T. (2002). Oligomeric state and stoichiometry of p24 proteins in the early secretory pathway. *J. Biol. Chem.* **277**, 46504-46511.
- Kaiser, C. (2000). Thinking about p24 proteins and how transport vesicles select their cargo. *Proc. Natl. Acad. Sci. USA* **97**, 3783-3785.
- Kamatkar, S., Radha, V., Nambirajan, S., Reddy, R. S. and Swarup, G. (1996). Two splice variants of a tyrosine phosphatase differ in substrate specificity, DNA binding and subcellular localization. *J. Biol. Chem.* **271**, 26755-26761.
- Klausner, R. D., Donaldson, J. G. and Lippincott-Schwartz, J. (1992). Brefeldin A: insights into the control of membrane traffic and organelle structure. *J. Cell Biol.* **116**, 1071-1080.
- Lavoie, C., Paiement, J., Dominguez, M., Roy, L., Dahan, S., Gushue, J. N. and Bergeron, J. J. M. (1999). Roles for alpha(2)p24 and COPI in endoplasmic reticulum cargo exit site formation. *J. Cell Biol.* **146**, 285-300.
- Linstedt, A. D. and Hauri, H. P. (1993). Giantin, a novel conserved Golgi membrane protein containing a cytoplasmic domain of at least 350 kDa. *Mol. Biol. Cell* **4**, 679-693.
- Lorenzen, J. A., Dadabay, C. Y. and Fischer, E. H. (1995). COOH terminal sequence motifs target the T-cell PTP to the endoplasmic reticulum and nucleus. *J. Cell Biol.* **131**, 631-643.
- Marks, M. S., Ohno, H., Kirchner, T. and Boniacino, J. S. (1997). Protein sorting by tyrosine-based signals: adapting to the Ys and wherefores. *Trends Cell Biol.* **7**, 124-128.
- Mosinger, B., Jr, Tillmann, U., Westphal, H. and Tremblay, M. L. (1992). Cloning and characterization of a mouse cDNA encoding a cytoplasmic protein tyrosine phosphatase. *Proc. Natl. Acad. Sci. USA* **89**, 499-503.
- Muniz, M., Nuoffer, C., Hauri, H. P. and Reizman, H. (2000). The EMP24 complex recruits a specific cargo molecule into endoplasmic reticulum-derived vesicles. *J. Cell Biol.* **148**, 925-930.
- Nickel, W., Brugger, B. and Wieland, F. T. (2002). Vesicular transport: the core machinery of CopI recruitment and budding. *J. Cell Sci.* **115**, 3235-3240.
- Preisinger, C. and Barr, F. A. (2001). Signaling pathways regulating Golgi structure and function. *Sci. STKE* **106**, PE38.
- Presley, J. F., Cole, N. B., Schroer, T. A., Hirschberg, K., Zaal, J. M. and Lippincott-Schwartz, J. (1997). ER-to-Golgi transport visualized in living cells. *Nature* **389**, 81-85.
- Radha, V., Kamatkar, S. and Swarup, G. (1993). Binding of a protein tyrosine phosphatase to DNA through its carboxy-terminal non-catalytic domain. *Biochemistry* **32**, 2194-2201.
- Radha, V., Nambirajan, S. and Swarup, G. (1994). Subcellular localization of a protein tyrosine phosphatase: evidence for association with chromatin. *Biochem. J.* **299**, 41-47.
- Radha, V., Rajanna, A. and Swarup, G. (2004). Phosphorylated guanine nucleotide exchange factor C3G, induced by pervanadate and Src family kinases localizes to the Golgi and subcortical actin cytoskeleton. *BMC Cell Biol.* **5**, 31.
- Reddy, R. S. and Swarup, G. (1995). Alternative splicing generates four different forms of a non-transmembrane protein tyrosine phosphatase mRNA. *DNA Cell Biol.* **14**, 1007-1015.
- Rojo, M., Pepperkok, R., Emery, G., Kellner, R., Stang, E., Parton, R. G. and

- Gruenberg, J.** (1997). Involvement of the transmembrane protein p23 in biosynthetic protein transport. *J. Cell Biol.* **139**, 1119-1135.
- Rojo, M., Emery, G., Marjomaki, V., McDowall, A. W., Parton, R. G. and Gruenberg, J.** (2000). The transmembrane protein p23 contributes to the organization of the Golgi apparatus. *J. Cell Sci.* **113**, 1043-1057.
- Schimmoller, F., Singer-Kruger, B., Schroder, S., Kruger, U., Barlowe, C. and Riezman, H.** (1995). The absence of Emp24p, a component of ER-derived COPII-coated vesicles, causes a defect in transport of selected proteins to the Golgi. *EMBO J.* **14**, 1329-1339.
- Schweizer, A., Fransen, J. A., Bachi, T., Ginsel, L. and Hauri, H. P.** (1988). Identification, by a monoclonal antibody, of a 53-kD protein associated with a tubulo-vesicular compartment at the cis-side of the Golgi apparatus. *J. Cell Biol.* **107**, 1643-1653.
- Sevier, C. S., Weisz, O. A., Davis, M. and Machamer, C. E.** (2000). Efficient export of the vesicular stomatitis virus G protein from the endoplasmic reticulum requires a signal in the cytoplasmic tail that includes both tyrosine-based and di-acidic motifs. *Mol. Biol. Cell* **11**, 13-22.
- Sohn, K., Orci, L., Ravazzola, M., Amherdt, M., Bremser, M., Lottspeich, F., Fiedler, K., Helms, J. B. and Wieland, F. T.** (1996). A major transmembrane protein of Golgi-derived COPI-coated vesicles involved in coatamer binding. *J. Cell Biol.* **135**, 1239-1248.
- Stammes, M. A., Craighead, M. W., Hoe, M. H., Lampen, N., Geromanos, S., Tempst, P. and Rothman, J. E.** (1995). An integral membrane component of coatamer-coated transport vesicles defines a family of proteins involved in budding. *Proc. Natl. Acad. Sci. USA* **92**, 8011-8015.
- Tiganis, T., Bennett, A. M., Ravichandran, K. S. and Tonks, N. K.** (1998). Epidermal growth factor receptor and the adaptor protein p52<sup>Shc</sup> are specific substrates of T-cell protein tyrosine phosphatase. *Mol. Cell Biol.* **18**, 1622-1634.
- Tillman, U., Wagner, J., Boerboom, S., Westphal, H. and Trembley, M. L.** (1994). Nuclear localization and cell cycle regulation of a murine protein tyrosine phosphatase. *Mol. Cell Biol.* **14**, 3030-3040.
- Tonks, N. K. and Neel, B. G.** (1996). From form to function: signaling by protein tyrosine phosphatases. *Cell* **87**, 365-368.
- Wen, C. and Greenwald, I.** (1999). p24 proteins and quality control of LIN-12 and GLP-1 trafficking in *Caenorhabditis elegans*. *J. Cell Biol.* **145**, 1165-1175.
- Wieland, F. T., Gleason, M. L., Serafini, T. A. and Rothman, J. E.** (1987). The rate of bulk flow from the endoplasmic reticulum to the cell surface. *Cell* **17**, 289-300.
